# Supplementary material for: Evaluation of the 2b-RAD method for genomic selection in scallop breeding
Source: PubMed Central journal article supplement (PMC4709697; doi:10.1038/srep19244), 2016-01-12

# Evaluation of the 2b-RAD method for genomic selection in scallop breeding

Jinzhuang Dou, Xue Li, Qiang Fu, Wenqian Jiao, Yangping Li, Tianqi Li, Yangfan Wang, Xiaoli Hu, Shi Wang\*, & Zhenmin Bao\*

## Supplementary Figures

**Figure S1.** Principal component analysis (a) and genetic kinships (b) of the simulated 20 full-sib families using the markers derived from the low-density panel (2,364). The numbers in brackets refer to the proportion of variance explained.

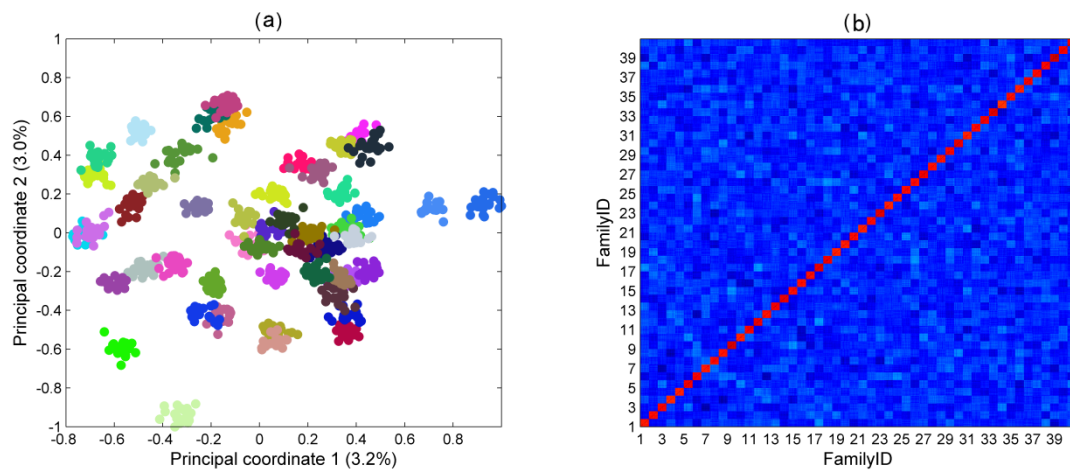

**Figure S2.** Accuracy of GEBVs estimated from a family-based dataset considering the dominant effects (Simulation 3). The vertical bar indicates the prediction accuracy under each scenario. The x-axis indicates the proportion of explained variation of additive effects, whereas the y-axis indicates the proportion of explained variation of dominant effects.

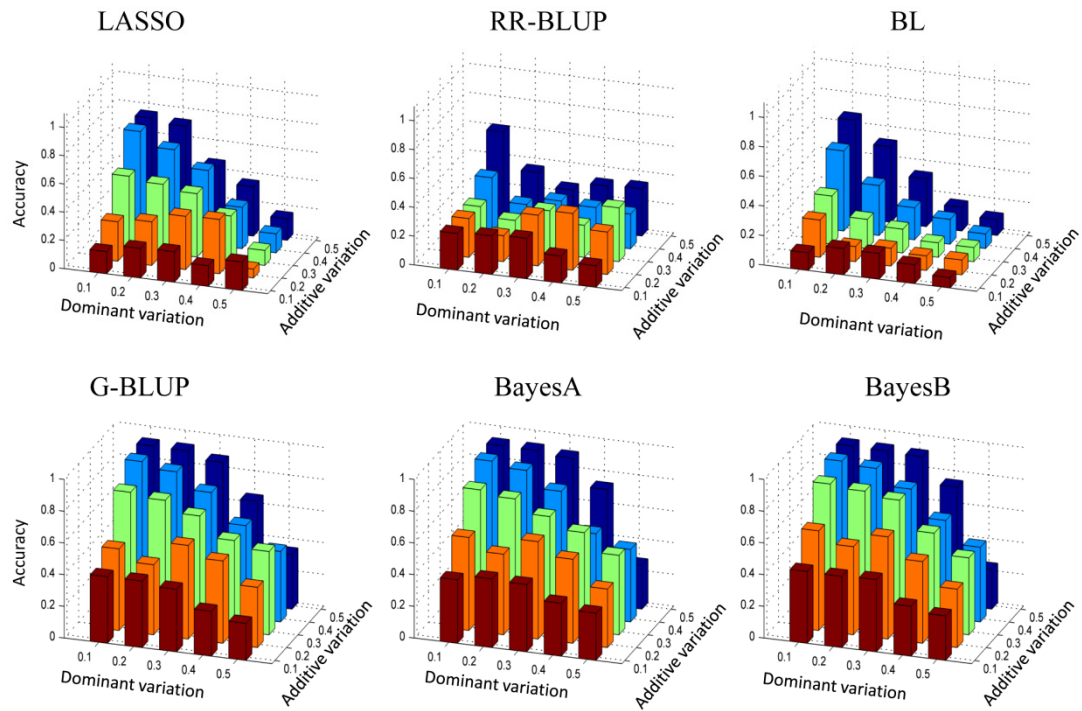

Supplement: srep19244-s1.pdf [file srep19244-s1.pdf]
